# Supplementary material for: Education quality and student satisfaction nexus using instructional material, support, classroom facilities, equipment and growth: Higher education perspective of Pakistan
Source: Frontiers journal article supplement (doi:10.3389/feduc.2023.1140971), 2023-03-23
Supplement: Table_1.DOCX [file Table_1.DOCX]

**Questionnaire**

**Section A: General Demographic Information of the Participants**

In this section, following items ask for some personal and institutional information. Please provide information and fill in or put a tick (✔) as appropriate as follow:

| Institute Name:   - __________________________________________ |
| --- |
| Program:   - Master - MPhil - Doctorate - Post doctorate |
| Field:   - Social Science - Arts - Science |
| Gender:   - Male - Female |
| Age:   - 21-25 - 26-30 - 31-35 - 36-40 - 41-45 - 46-50 - Over 51 |

**Section B: Education Quality**

| **B1: Teaching and Learning Materials (TL)**  This section consists of the various elements of the **Teaching and Learning Materials**. By answering these questions, you are providing the opinions as per having experience with your educational institute to each of these elements. | | **Strongly Disagree**  **(SD)** | **Disagree**  **(D)** | **Neutral**  **(N)** | **Agree**  **(A)** | **Strongly Agree**  **(SA)** |
| --- | --- | --- | --- | --- | --- | --- |
| 1 | 2 | 3 | 4 | 5 |
| TL1 | The study materials (powerpoint, recordings, videos, clips, and documentaries) helped me in study the course material. |  |  |  |  |  |
| TL2 | The program of study / learning track of material taught during contact hours was sufﬁcient, clearer to me and coherent. |  |  |  |  |  |
| TL3 | The courses have helped me to develop my problem-solving skills. |  |  |  |  |  |
| TL4 | The courses have sharpened my analytic skills. |  |  |  |  |  |
| TL5 | The courses have helped me to develop ability to work as a team member. |  |  |  |  |  |
| TL6 | The courses have improved my academic writing skills. |  |  |  |  |  |
| TL7 | The courses have helped me in developing the ability of own work plan. |  |  |  |  |  |
| TL8 | The courses have encouraged me to develop my own academic interest as much as I can. |  |  |  |  |  |

| **B2: Physical Infrastructure and Facilities (PH)**  This section consists of the various elements of the P**hysical Infrastructure and Facilities**. By answering these questions, you are providing the opinions as per having experience with your educational institute to each of these elements. | | **Strongly Disagree**  **(SD)** | **Disagree**  **(D)** | **Neutral**  **(N)** | **Agree**  **(A)** | **Strongly Agree**  **(SA)** |
| --- | --- | --- | --- | --- | --- | --- |
| 1 | 2 | 3 | 4 | 5 |
| PH1 | The university has an ideal location with excellent campus layout and appearance. |  |  |  |  |  |
| PH2 | The university is having adequate lecture rooms. |  |  |  |  |  |
| PH3 | The university has an online registration process. |  |  |  |  |  |
| PH4 | There is an ease of accomplishing transactions (online payments) through the university website. |  |  |  |  |  |
| PH5 | Result of the examination is available online. |  |  |  |  |  |
| PH6 | Existence of a library containing the latest versions and important books and references in the university. |  |  |  |  |  |
| PH7 | Bookshop in the university is providing the most important services (stationery, photography, printing, and binding) |  |  |  |  |  |
| PH8 | The university is having existence of care for public facilities (cafeteria, masjid, gym, indoor games, and health center) |  |  |  |  |  |
| PH9 | In the cafeteria quality food and drinks are available in an affordable price. |  |  |  |  |  |

| **B3: Teaching Methods (TM)**  This section consists of the various elements of the **Teaching Methods**. By answering these questions, you are providing the opinions as per having experience with your educational institute to each of these elements. | | **Strongly Disagree**  **(SD)** | **Disagree**  **(D)** | **Neutral**  **(N)** | **Agree**  **(A)** | **Strongly Agree**  **(SA)** |
| --- | --- | --- | --- | --- | --- | --- |
| 1 | 2 | 3 | 4 | 5 |
| TM1 | The teaching method (e.g., lectures, usage of online learning environment, videos, clips, recordings, and documentaries) has helped me prepare for the course examination. |  |  |  |  |  |
| TM2 | The teaching method (i.e., lectures, tutorials, videos, clips, recordings, and documentaries) stimulated me to participate actively. |  |  |  |  |  |
| TM3 | The teachers make a real effort to understand difﬁculties I am having with my work. |  |  |  |  |  |
| TM4 | Teachers here normally give helpful feedback on how I am going. |  |  |  |  |  |
| TM5 | Teachers here work hard to make subjects interesting. |  |  |  |  |  |
| TM6 | Teachers here put a lot of time to give proper feedback on students’ work. |  |  |  |  |  |
| TM7 | Conferences, seminar, workshops, educational field trips and different meetings are arranged for updating the knowledge. |  |  |  |  |  |

| **B4: Assessment (AS)**  This section consists of the various elements of the **Assessment**. By answering these questions, you are providing the opinions as per having experience with your educational institute to each of these elements. | | **Strongly Disagree**  **(SD)** | **Disagree**  **(D)** | **Neutral**  **(N)** | **Agree**  **(A)** | **Strongly Agree**  **(SA)** |
| --- | --- | --- | --- | --- | --- | --- |
| 1 | 2 | 3 | 4 | 5 |
| AS1 | The teachers here make it clear right from the start what they expect from me. |  |  |  |  |  |
| AS2 | Teachers seem more interested in testing what I have learned than what I have understood. |  |  |  |  |  |
| AS3 | Most of the teachers ask me questions just about facts. |  |  |  |  |  |
| AS4 | It is always easy here to know the standard of work expected. |  |  |  |  |  |
| AS5 | It would be possible to get through the courses just by working hard during exams. |  |  |  |  |  |
| AS6 | There’s very little choice in the courses in the ways you are assessed. |  |  |  |  |  |

**Section C: Students’ Satisfaction**

| **C1: Instructional Material (IM)**  This section consists of the various elements of the **Instructional Materials**. By answering these questions, you are providing the opinions as per having experience with your educational institute to each of these elements. | | **Strongly Disagree**  **(SD)** | **Disagree**  **(D)** | **Neutral**  **(N)** | **Agree**  **(A)** | **Strongly Agree**  **(SA)** |
| --- | --- | --- | --- | --- | --- | --- |
| 1 | 2 | 3 | 4 | 5 |
| IM1 | I am satisfied with management and teaching resources in university. |  |  |  |  |  |
| IM2 | I am satisfied with coordination of educational activities in university. |  |  |  |  |  |
| IM3 | I am satisfied with management of higher education teaching content and staff. |  |  |  |  |  |
| IM4 | I am satisfied with adequate timetables and shifts. |  |  |  |  |  |
| IM5 | I am satisfied with adequate timeline for achieving syllabus objectives. |  |  |  |  |  |
| IM6 | I am satisfied with availability of syllabus information (web page or other sources) |  |  |  |  |  |
| IM7 | I am satisfied with usefulness of existing syllabus information (web page or other sources). |  |  |  |  |  |

| **C2: Instructional Support (IS)**  This section consists of the various elements of the **Instructional Support**. By answering these questions, you are providing the opinions as per having experience with your educational institute to each of these elements. | | **Strongly Disagree**  **(SD)** | **Disagree**  **(D)** | **Neutral**  **(N)** | **Agree**  **(A)** | **Strongly Agree**  **(SA)** |
| --- | --- | --- | --- | --- | --- | --- |
| 1 | 2 | 3 | 4 | 5 |
| IS1 | I am satisfied with accessibility of Syllabus information (web page or other sources). |  |  |  |  |  |
| IS2 | I am satisfied with orientation systems and welcome programs for new students. |  |  |  |  |  |
| IS3 | I am satisfied with IT lab use. |  |  |  |  |  |
| IS4 | I am satisfied with variety and adequacy of teaching methodology included in the syllabus. |  |  |  |  |  |
| IS5 | I am satisfied with collaboration between higher education and other sustainability civil society organizations. |  |  |  |  |  |

| **C3: Classroom Facilities and Equipment (CF)**  This section consists of the various elements of the **Classroom Facilities and Equipment**. By answering these questions, you are providing the opinions as per having experience with your educational institute to each of these elements. | | **Strongly Disagree**  **(SD)** | **Disagree**  **(D)** | **Neutral**  **(N)** | **Agree**  **(A)** | **Strongly Agree**  **(SA)** |
| --- | --- | --- | --- | --- | --- | --- |
| 1 | 2 | 3 | 4 | 5 |
| CF1 | I am satisfied with classrooms and equipment meet sustainability protocols. |  |  |  |  |  |
| CF2 | I am satisfied with sports facilities and equipment. |  |  |  |  |  |
| CF3 | I am satisfied with existence of specific areas for protection of sustainability materials and resources. |  |  |  |  |  |
| CF4 | I am satisfied with labs and workshops and their equipment. |  |  |  |  |  |
| CF5 | I am satisfied with internet connection at the university. |  |  |  |  |  |

| **C4: Growth (GR)**  This section consists of the various elements of the **Growth**. By answering these questions, you are providing the opinions as per having experience with your educational institute to each of these elements. | | **Strongly Disagree**  **(SD)** | **Disagree**  **(D)** | **Neutral**  **(N)** | **Agree**  **(A)** | **Strongly Agree**  **(SA)** |
| --- | --- | --- | --- | --- | --- | --- |
| 1 | 2 | 3 | 4 | 5 |
| GR1 | I am satisfied with overall environment of cooperation and collaboration amongst students. |  |  |  |  |  |
| GR2 | I am satisfied with degree of availability of staff to students. |  |  |  |  |  |
| GR3 | I am satisfied with the university fulfils my expectations. |  |  |  |  |  |
| GR4 | I am satisfied with the university is just how I would like them to be. |  |  |  |  |  |
| GR5 | I am satisfied with the university. |  |  |  |  |  |
| GR6 | I would recommend the university to others. |  |  |  |  |  |
| GR7 | Thinking back on your experience within the university, how you rate your overall satisfaction? |  |  |  |  |  |

**Thank You.**
